# Supplementary material
Source: PubMed Central journal article supplement (PMC3362787)
Supplement: supp_111.042697_Cui_Cyp_ontogeny_Table_1.pdf [file supp_111.042697_Cui_Cyp_ontogeny_Table_1.pdf]

| Mouse Cyps | Human Cyps  | Mouse GeneID | Mouse mRNA ID | Mouse Protein ID | DNA Identity(%) | Protein Identity(%) | Chromosome Loc. |
|------------|-------------|--------------|---------------|------------------|-----------------|---------------------|-----------------|
| Cyp1a1     | CYP1A1      | 13076        | NM_009992     | NP_034122        | 82.7            | 80.6                | 9               |
| Cyp1a2     | CYP1A2      | 13077        | NM_009993     | NP_034123        | 79.9            | 73                  | 9               |
| Cyp1b1     | CYP1B1      | 13078        | NM_009994     | NP_034124        | 81.8            | 81                  | 17              |
| Cyp2a4     | CYP2A6/7/13 | 13086        | NM_009997     | NP_034127        | 83.4/83.2/84.3  | 83.6/82/86.6        | 7               |
| Cyp2a5     | CYP2A6/7/13 | 13087        | NM_007812     | NP_031838        | 84.6/84.3/85.5  | 85.2/83/6/88/5      | 7               |
| Cyp2a22    | N/A         | 233005       | NM_001101467  | NP_001094937     | N/A             | N/A                 | 7               |
| Cyp2b9     | N/A         | 13094        | NM_010000     | NP_034130        | N/A             | N/A                 | 7               |
| Cyp2b10    | CYP2B6      | 13088        | NM_009999     | NP_034128        | 78.1            | 75.8                | 7               |
| Cyp2b13    | N/A         | 13089        | NM_007813     | NP_031839        | N/A             | N/A                 | 7               |
| Cyp2b19    | N/A         | 13090        | NM_007814     | NP_031840        | N/A             | N/A                 | 7               |
| Cyp2b23    | N/A         | 243881       | NM_001081148  | NP_001074617     | N/A             | N/A                 | 7               |
| Cyp2c29    | N/A         | 13095        | NM_007815.3   | NP_031841.3      | N/A             | N/A                 | 19              |
| Cyp2c37    | CYP2C19     | 13096        | NM_010001     | NP_034131        | 78.5            | 72.4                | 19              |
| Cyp2c38    | N/A         | 13097        | NM_010002     | NP_034132        | N/A             | N/A                 | 19              |
| Cyp2c39    | N/A         | 13098        | NM_010003     | NP_034133        | N/A             | N/A                 | 19              |
| Cyp2c40    | N/A         | 13099        | NM_010004     | NP_034134        | N/A             | N/A                 | 19              |
| Cyp2c44    | N/A         | 226143       | NM_001001446  | NP_001001446     | N/A             | N/A                 | 19              |
| Cyp2c50    | CYP2C19     | 107141       | NM_134144     | NP_598905        | 78.5            | 72.6                | 19              |
| Cyp2c54    | CYP2C19     | 404195       | NM_206537     | NP_996260        | 77.9            | 70.8                | 19              |
| Cyp2c55    | CYP2C18     | 72082        | NM_028089     | NP_082365        | 81.9            | 76.3                | 19              |
| Cyp2c66    | CYP2C8      | 69888        | NM_001011707  | NP_001011707     | 78.4            | 72.4                | 19              |
| Cyp2c67    | N/A         | 545288       | NM_001024719  | NP_001019890     | N/A             | N/A                 | 19              |
| Cyp2c68    | N/A         | 433247       | NM_001039555  | NP_001034644     | N/A             | N/A                 | 19              |
| Cyp2c69    | N/A         | 100043108    | XM_001479745  | XP_001479795     | N/A             | N/A                 | 19              |
| Cyp2c70    | N/A         | 226105       | NM_145499     | NP_663474        | N/A             | N/A                 | 19              |
| Cyp2d9     | N/A         | 13105        | NM_010006     | NP_034136        | N/A             | N/A                 | 15              |
| Cyp2d10    | N/A         | 13101        | NM_010005     | NP_034135        | N/A             | N/A                 | 15              |
| Cyp2d11    | N/A         | 545123       | NM_001104531  | NP_001098001     | N/A             | N/A                 | 15              |
| Cyp2d12    | N/A         | 380997       | NM_201360     | NP_958748        | N/A             | N/A                 | 15              |
| Cyp2d22    | CYP2D6      | 56448        | NM_019823     | NP_062797        | 79.9            | 75.8                | 15              |
| Cyp2d26    | N/A         | 76279        | NM_029562     | NP_083838        | N/A             | N/A                 | 15              |
| Cyp2d34    | N/A         | 223706       | NM_145474     | NP_663449        | N/A             | N/A                 | 15              |
| Cyp2d40    | N/A         | 71754        | NM_023623     | NP_076112        | N/A             | N/A                 | 15              |
| Cyp2e1     | CYP2E1      | 13106        | NM_021282     | NP_067257        | 79.4            | 78.1                | 7               |
| Cyp2g1     | N/A         | 13108        | NM_013809     | NP_038837        | N/A             | N/A                 | 7               |
| Cyp2f2     | CYP2F1      | 13107        | NM_007817     | NP_031843        | 82.6            | 81.9                | 7               |
| Cyp2j5     | N/A         | 13109        | NM_010007     | NP_034137        | N/A             | N/A                 | 4               |
| Cyp2j6     | CYP2J2      | 13110        | NM_010008     | NP_034138        | 78.3            | 76.2                | 4               |

| Mouse Cyps | Human Cyps | Mouse GeneID | Mouse mRNA ID | Mouse Protein ID | DNA Identity(%) | Protein Identity(%) | Chromosome Loc. |
|------------|------------|--------------|---------------|------------------|-----------------|---------------------|-----------------|
| Cyp2j7     | N/A        | 546837       | NM_001104926  | NP_001098396     | N/A             | N/A                 | 4               |
| Cyp2j8     | N/A        | 665095       | NM_001104927  | NP_001098397     | N/A             | N/A                 | 4               |
| Cyp2j9     | N/A        | 74519        | NM_028979     | NP_083255        | N/A             | N/A                 | 4               |
| Cyp2j11    | N/A        | 100066       | NM_001004141  | NP_001004141     | N/A             | N/A                 | 4               |
| Cyp2j12    | N/A        | 242546       | NM_001100182  | NP_001093652     | N/A             | N/A                 | 4               |
| Cyp2j13    | N/A        | 230459       | NM_145548     | NP_663523        | N/A             | N/A                 | 4               |
| Cyp2t4     | N/A        | 384724       | NM_001100184  | NP_001093654     | N/A             | N/A                 | 7               |
| Cyp2u1     | CYP2U1     | 71519        | NM_027816     | NP_082092        | 78.3            | 79.5                | 3               |
| Cyp2w1     | CYP2W1     | 545817       | NM_001160265  | NP_001153737     | 78.5            | 77.9                | 5               |
| Cyp3a11    | CYP3A4     | 13112        | NM_007818     | NP_031844        | 78.1            | 72.8                | 5               |
| Cyp3a13    | CYP3A7     | 13113        | NM_007819     | NP_031845        | 79.6            | 72.5                | 5               |
| Cyp3a16    | CYP3A4     | 13114        | NM_007820     | NP_031846        | 77.6            | 70.6                | 5               |
| Cyp3a25    | CYP3A43    | 56388        | NM_019792     | NP_062766        | 74.4            | 66.5                | 5               |
| Cyp3a41a   | CYP3A4     | 53973        | NM_017396     | NP_059092        | 77.2            | 71.6                | 5               |
| Cyp3a41b   | CYP3A4     | 100041375    | NM_001105159  | NP_001098629     | 77.3            | 71.4                | 5               |
| Cyp3a44    | CYP3A4     | 337924       | NM_177380     | NP_796354        | 76.7            | 69.6                | 5               |
| Cyp3a57    | CYP3A43    | 622127       | NM_001100180  | NP_001093650     | 74.8            | 65.6                | 5               |
| Cyp3a59    | CYP3A43    | 100041449    | NM_001105160  | NP_001098630     | 74.4            | 65.2                | 5               |
| Cyp4a10    | CYP4A11    | 13117        | NM_010011     | NP_034141        | 79.3            | 77.4                | 4               |
| Cyp4a12a   | CYP4A22    | 277753       | NM_177406     | NP_803125        | 79.2            | 75                  | 4               |
| Cyp4a12b   | CYP4A22    | 13118        | NM_172306     | NP_758510        | 79.6            | 75.5                | 4               |
| Cyp4a14    | N/A        | 435802       | NM_001100185  | NP_001093655     | N/A             | N/A                 | 4               |
| Cyp4a29    | N/A        | 230639       | NM_001100183  | NP_001093653     | N/A             | N/A                 | 4               |
| Cyp4a30b   | N/A        | 435802       | NM_001100185  | NP_001093655     | N/A             | N/A                 | 4               |
| Cyp4a31    | N/A        | 666168       | NM_201640     | NP_964002        | N/A             | N/A                 | 4               |
| Cyp4a32    | CYP4A11    | 100040843    | NM_001100181  | NP_001093651     | 78.9            | 76.2                | 4               |
| Cyp4b1     | CYP4B1     | 13120        | NM_007823     | NP_031849        | 85.7            | 85.1                | 4               |
| Cyp4f13    | N/A        | 170716       | NM_130882     | NP_570952        | N/A             | N/A                 | 17              |
| Cyp4f14    | CYP4F12    | 64385        | NM_022434     | NP_071879        | 79.1            | 75.3                | 17              |
| Cyp4f15    | CYP4F2     | 106648       | NM_134127     | NP_598888        | 81.6            | 80.4                | 17              |
| Cyp4f16    | N/A        | 70101        | NM_024442     | NP_077762        | N/A             | N/A                 | 17              |
| Cyp4f17    | CYP4F8     | 208285       | NM_001101445  | NP_001094915     | 76.1            | 71.1                | 17              |
| Cyp4f18    | CYP4F3     | 72054        | NM_024444     | NP_077764        | 82.2            | 81.5                | 8               |
| Cyp4f39    | CYP4F22    | 320997       | NM_177307     | NP_796281        | 83              | 86.8                | 17              |
| Cyp4f40    | CYP4F11    | 631304       | NM_001101588  | NP_001095058     | 78.8            | 78.4                | 17              |
| Cyp4v3     | CYP4V2     | 285440       | NM_133969     | NP_598730        | 82.1            | 82.1                | 8               |
| Cyp4x1     | CYP4X1     | 81906        | NM_001003947  | NP_001003947     | 81.1            | 71.2                | 4               |
