# Supplementary material
Source: PubMed Central journal article supplement (PMC3362787)
Supplement: supp_111.042697_Cui_Cyp_ontogeny_Table_2.pdf [file supp_111.042697_Cui_Cyp_ontogeny_Table_2.pdf]

Article Title: The Ontogeny of Novel Cytochrome P450 Gene Isoforms during Postnatal Liver Maturation in Mice

Authors: Julia Yue Cui, Helen J. Renaud, and Curtis D. Klaassen

Journal Title: Drug Metabolism and Disposition

Table Legend: Cyp mRNA accession numbers and panel IDs for the Panomics Multiplex suspension bDNA assay

**Cui et al. Table s2**

| Gene Name | Accession Number | Panel ID |
|-----------|------------------|----------|
| Cyp1a1    | NM_001136059     | 21211    |
| Cyp1a2    | NM_009993        | 21211    |
| Cyp1b1    | NM_009994        | 21211    |
| Cyp2a4    | NM_009997        | 21211    |
| Cyp2a22   | NM_001101467     | 21211    |
| Cyp2b9    | NM_010000        | 21211    |
| Cyp2b10   | NM_009999        | 21211    |
| Cyp2b13   | NM_007813        | 21211    |
| Cyp2b19   | NM_007814        | 21211    |
| Cyp2b23   | NM_001081148     | 21211    |
| Cyp2c29   | NM_007815        | 21211    |
| Cyp2c38   | NM_010002        | 21211    |
| Cyp2c39   | NM_010003        | 21211    |
| Cyp2c44   | NM_001001446     | 21211    |
| Cyp2c55   | NM_028089        | 21211    |
| Cyp2c66   | NM_001011707     | 21211    |
| Cyp2c70   | NM_145499        | 21211    |
| Cyp2d22   | NM_019823        | 21211    |
| Cyp2d26   | NM_029562        | 21212    |
| Cyp2d34   | NM_145474        | 21212    |
| Cyp2d40   | NM_023623        | 21212    |
| Cyp2e1    | NM_021282        | 21212    |
| Cyp2g1    | NM_013809        | 21212    |
| Cyp2f2    | NM_007817        | 21212    |
| Cyp2j5    | NM_010007        | 21212    |
| Cyp2j6    | NM_010008        | 21212    |
| Cyp2j7    | NM_001104926     | 21212    |
| Cyp2j8    | NM_001104927     | 21212    |
| Cyp2j9    | NM_028979        | 21212    |
| Cyp2j11   | NM_001004141     | 21212    |
| Cyp2j13   | NM_145548        | 21212    |
| Cyp2t4    | NM_001100184     | 21212    |
| Cyp2u1    | NM_027816        | 21212    |
| Cyp2w1    | NM_001160265     | 21212    |
| Cyp3a11   | NM_007818        | 21212    |
| Cyp3a13   | NM_007819        | 21212    |
| Cyp3a16   | NM_007820        | 21213    |
| Cyp3a25   | NM_019792        | 21213    |
| Cyp3a41a  | NM_017396        | 21213    |
| Cyp3a44   | NM_177380        | 21213    |
| Cyp4a10   | NM_010011        | 21213    |
| Cyp4a14   | NM_007822        | 21213    |
| Cyp4a29   | NM_001100183     | 21213    |
| Cyp4a30b  | NM_001100185     | 21213    |
| Cyp4b1    | NM_007823        | 21213    |
| Cyp4f13   | NM_130882        | 21213    |
| Cyp4f14   | NM_022434        | 21213    |
| Cyp4f15   | NM_134127        | 21213    |
| Cyp4f16   | NM_024442        | 21213    |
| Cyp4f17   | NM_001101445     | 21213    |
| Cyp4f18   | NM_024444        | 21213    |
| Cyp4f39   | NM_177307        | 21213    |
| Cyp4f40   | NM_001101588     | 21213    |
| Cyp4v3    | NM_133969        | 21213    |
| Cyp4x1    | NM_001003947     | 21213    |
