# Supplementary material
Source: PubMed Central journal article supplement (PMC3362787)
Supplement: supp_111.042697_Cui_Cyp_ontogeny_Table_3.pdf [file supp_111.042697_Cui_Cyp_ontogeny_Table_3.pdf]

Article Title: The Ontogeny of Novel Cytochrome P450 Gene Isoforms during Postnatal Liver Maturation in Mice

Authors: Julia Yue Cui, Helen J. Renaud, and Curtis D. Klaassen

Journal Title: Drug Metabolism and Disposition

Table Legend: RT-PCR primer sequences for Cyp mRNA detection

Cui et al. Table s3

| gene Name  | accession Number         | Forward Primer            | Reverse Primer           |
|------------|--------------------------|---------------------------|--------------------------|
| Cyp2a5     | NM_007812                | agtgcattgggaaggggaagagagt | acccaaggccaagcacacaga    |
| Cyp2c37    | NM_010001                | tcctgggctgtgctccttgc      | tgcaaatctgcaaccaagggtg   |
| Cyp2c40    | NM_010004                | tctacaggaagggtcattgg      | gaccctgtggctttcata       |
| Cyp2c50    | NM_134144                | ctcattggattggcctcagt      | aggaatgaagcagagctgga     |
| Cyp2c54    | NM_206537                | ttgaccatggggatgtcttt      | atccaatgccattccatta      |
| Cyp2c67    | NM_001024719             | acaccgcagcccctgatgc       | tgcaccaaactaattggccaaggt |
| Cyp2c68    | NM_001039555             | tggagtgcctgatcatacca      | ccacagtgcaggagaagca      |
| Cyp2c69    | XM_001479745             | gtgcttcatccctgtggaat      | tgggactgggttaaatgagg     |
| Cyp2d9     | NM_010006                | aaggctggctgacaaggccc      | tcggggtgcttgacagggt      |
| Cyp2d10    | NM_010005                | ttcgggtgccccctacccc       | tcagcctgccctgcctacca     |
| Cyp2d11    | NM_001104531             | tctcagtgcctgatggacag      | cacagagctgtaggggaag      |
| Cyp2d12    | NM_201360                | acactgctgaccgcctcca       | tgctctgccactcaggtcca     |
| Cyp2j12    | NM_001100182             | ctgatagcacactggctgga      | ggtcctgtgaagagctgtc      |
| Cyp3a41a/b | NM_017396 / NM_001105159 | agcagaagcaccgagttgat      | gactgggctgtgatctccat     |
| Cyp3a59/25 | NM_001105160             | agtactggccagagcctcaa      | tcgttctccttctgaaacct     |
| Cyp4a12a/b | NM_177406 / NM_172306    | ctcattcctgcccttctcag      | ggtatggggattgggactct     |
| Cyp4a31    | NM_201640                | tgcaggcagcctctctggct      | gggcgggtgatgggaactgct    |
| Cyp4a32    | NM_001100181             | tctgctctaagcccgaccgga     | gcagcaggagcagaccgagc     |
